# Supplementary material
Source: HighWire-hosted journal article supplement (https://cmaj.ca/highwire/filestream/57966/field_highwire_adjunct_files/0/pg469-f.pdf)
Supplement: pg469-f.pdf [file pg469-f.pdf]

# Le point sur les soins de santé préventifs en l'an 2001 : le dépistage du cancer du sein au moyen de la mammographie chez les femmes de 40 à 49 ans exposées à un risque moyen

Jolie Ringash et le Groupe d'étude canadien sur les soins de santé préventifs\*

## Résumé

**Objectif :** Selon une analyse antérieure effectuée en 1994 par le Groupe d'étude canadien sur l'examen médical périodique (désormais le Groupe d'étude canadien sur les soins de santé préventifs), il y avait alors lieu d'exclure de l'examen médical périodique la mammographie de dépistage du cancer du sein chez les femmes de 40 à 49 ans. La présente analyse tient compte des preuves nouvelles et mises à jour relatives aux effets de la mammographie de dépistage sur la mortalité liée au cancer du sein chez les femmes de cette tranche d'âge exposées à un risque moyen.

**Options :** Débuter les mammographies de dépistage chez les femmes dès l'âge de 40 ans ou dès l'âge de 50 ans.

**Résultat :** Réduire la mortalité liée au cancer du sein.

**Preuves :** On a interrogé les réseaux MEDLINE et CANCERLIT pour relever les articles pertinents publiés entre 1966 et janvier 2000. Parmi les 68 références recensées, au moins 22 ont été publiées après l'analyse de 1994. À ce jour, la seule étude conçue pour mesurer les avantages de la mammographie de dépistage en terme de réduction de la mortalité chez les femmes de 40 à 49 ans n'était pas doté d'une puissance statistique suffisante pour exclure l'existence d'un avantage significatif sur le plan clinique. Les autres résultats tirés d'études randomisées contrôlées découlent d'analyses rétrospectives de sous-groupes appartenant à des études de plus grande envergure.

**Avantages, préjudices et coûts :** En plus de réduire la mortalité, la mammographie de dépistage offre des avantages potentiels significatifs, notamment le diagnostic précoce, le recours à un traitement moins énergique et l'amélioration des résultats sur le plan esthétique. Par contre, les risques associés au dépistage sont : les taux plus élevés de biopsies et les effets psychologiques d'une fausse rassurance ou de résultats faussement positifs. Bien que plusieurs des études passées en revue constituent des preuves de niveau 1 (études randomisées contrôlées), pour l'instant leurs résultats discordants, leurs différences méthodologiques et plus encore, le rapport risque:avantage imprécis du dépistage empêche le groupe d'assigner la cote «bonnes» ou «acceptables» aux recommandations qu'on peut en tirer.

**Valeurs :** La validité des preuves fournies a été évaluée à l'aide de méthodes élaborées par le Groupe d'étude canadien sur les soins de santé préventifs. Une valeur élevée a été assignée aux changements des taux de survie. Lorsque les données probantes étaient accessibles, une valeur a aussi été accordée au retentissement potentiel sur la qualité de vie.

**Recommandations :** Les preuves actuelles quant à l'efficacité de la mammographie de dépistage n'appuient ni leur inclusion, ni leur exclusion de l'examen de santé périodique chez les femmes de 40 à 49 ans exposées à un risque moyen à

## Research

## Recherche

Le Dr Ringash est professeure adjointe au département de radio-oncologie et d'administration sanitaire de l'hôpital Princess Margaret, rattaché au University Health Network et à l'Université de Toronto, Toronto (Ont.).

\*La liste des membres du groupe est publiée à la fin de l'article.

Cet article a fait l'objet d'un examen par les pairs.

Traduction d'un article paru dans le JAMC 2001;164(4):469-76

‡ Voir l'article connexe en [page 498](#)

l'égard du cancer du sein (recommandation de catégorie C). Lorsqu'elles atteignent 40 ans, les femmes canadiennes devraient être informées des bienfaits et des risques potentiels de la mammographie de dépistage et guidées dans leur décision quant à l'âge à partir duquel elles souhaitent débiter ce dépistage.

**Validation :** Les observations de cette analyse ont été passées en revue par les membres du Groupe d'étude canadien sur les soins de santé préventifs au moyen d'un processus itératif.

**Commanditaire :** Le Groupe d'étude canadien sur les soins de santé préventifs est subventionné par l'entremise d'un partenariat établi entre les ministères de la Santé des provinces et des territoires et Santé Canada.

En 1999, on a dénombré 18 700 nouveaux cas de cancer du sein et 5400 décès des suites de la maladie.<sup>1</sup> Pour les femmes exposées à un risque moyen, la prévention secondaire (dépistage précoce), peut réduire le taux de mortalité lié au cancer du sein. Les études randomisées contrôlées ont montré que la mammographie de dépistage réduit le taux de mortalité chez les femmes de 50 à 70 ans. Par contre, l'Étude nationale canadienne sur le dépistage du cancer du sein (Canadian National Breast Screening Study [NBSS])<sup>2</sup> n'a fait état d'aucune réduction de la mortalité chez les femmes de 40 à 49 ans.<sup>3</sup> En 1994, le Groupe d'étude canadien sur l'examen médical périodique (désormais le Groupe d'étude canadien sur les soins de santé préventifs) a conclu que les preuves étaient suffisantes pour exclure le dépistage au moyen de l'examen clinique et de la mammographie pour cette tranche d'âge (recommandation de catégorie D).<sup>4</sup> À l'heure actuelle, les Canadiennes de moins de 50 ans ne sont pas invitées à subir un test de dépistage du cancer du sein, mais elles peuvent subir un dépistage dans sept des onze régions canadiennes (Gloria Low, Santé Canada : données non publiées, décembre 1999).

En tout, sept études cliniques randomisées contrôlées ont été conduites chez des femmes de 40 à 49 ans. Lors de récentes mises à jour, deux études suédoises<sup>5,6</sup> ont fait état d'un avantage statistiquement significatif associé à la mammographie de dépistage dans des analyses de sous-groupes. Les plus récentes méta-analyses ont pour leur part donné des résultats mitigés. Dans l'une des analyses qui regroupait les sept études, on a fait état d'une réduction statistiquement significative (de 18 %)<sup>7</sup> du risque relatif, alors qu'une seconde analyse sur deux études seulement et qui, de l'avis des auteurs, ne comportait pas de biais, n'a conclu à aucun effet<sup>8</sup>.

Les directives actuelles en ce qui concerne la mammographie de dépistage chez les femmes de 40 à 49 ans ne concordent pas. L'American Association for Cancer Research<sup>9</sup> et les National Institutes of Health ne recommandent pas le recours au dépistage universel.<sup>10</sup> En revanche, l'American Cancer Society<sup>11</sup> et le National Cancer Institute<sup>12</sup> préconisent le recours à un dépistage annuel ou bisannuel.

L'objectif de cette analyse est de mettre à jour les recommandations du groupe de travail de 1994 sur la base de preuves plus récentes et de tenir compte des autres effets favorables ou défavorables de la mammographie de dépistage chez les femmes de 40 à 49 ans.

## Méthodes

Une interrogation informatique des bases de données MEDLINE et CANCERLIT a été effectuée pour recenser les articles publiés entre 1966 et janvier 2000 au moyen des termes MeSH (medical subject heading) suivants : «prevention and control» + «mammography» + «breast neoplasms»; et «mammography» + «breast neoplasms» + l'un ou l'autre des 21 termes ou noms d'auteurs suivants : «controlled clinical trials», «randomized controlled trials», «double-blind method», «random allocation», «prospective studies», «cohort studies», «meta-analysis», ou les noms d'auteurs Nystrom, Rutqvist, Wall, Lindgren, Lindqvist, Ryden, Andersson, Bjurstam, Fagerberg, Frisell, Shapiro, Tabar, Miller, Baines. Les études répondant à tous les critères d'inclusion (Tableau 1) ont été passées en revue. Aucune étude ne fut exclue par les critères de qualité retenus.

Pour les études montrant une réduction de la mortalité associée à la mammographie de dépistage, le nombre qu'il faut dépister (*number needed to screen*) sur une période de dix ans pour prévenir un décès a été calculé comme la réciproque de la réduction du risque absolu attribuée au dépistage. Cette terminologie correspond au nombre de sujets qu'il faut traiter pour prévenir un décès dans le cadre des études thérapeutiques.<sup>13</sup>

De même, les réseaux MEDLINE et CANCERLIT ont été interrogés et une liste de référence a été passée en revue manuellement pour y recenser des études qui mesuraient les effets physiques et psychologiques de la mammographie. Étant donné qu'aucune étude randomisée contrôlée n'avait porté sur ces questions à titre d'issues principales, ce sont les études de cohorte, les études cas-témoins et les études transversales qui ont été passées en revue.

Les preuves ont été analysées systématiquement à l'aide de la

**Tableau 1 : Critères d'inclusion et d'exclusion utilisés pour sélectionner les études en vue d'étudier la mammographie de dépistage chez les femmes âgées de 40 à 49 ans**

### Critères d'inclusion

- Femmes âgées de 40 à 49 ans, exposées à un risque moyen de cancer du sein, formant soit l'ensemble ou un sous-groupe des femmes participantes
- Mammographie de dépistage utilisée seule ou en association avec l'examen clinique du sein
- Paramètre principal : mortalité liée au cancer du sein
- Étude randomisée contrôlée ou méta-analyse incluant toutes les études randomisées contrôlées admissibles

### Critères d'exclusion

- Suivi minimum inférieur à 10 ans
- Confirmation de l'issue < 90 % terminé

méthodologie mise sur pied par le Groupe d'étude canadien sur les soins de santé préventifs.<sup>14</sup> En bref, l'auteur principal a évalué la qualité des preuves à l'aide du classement méthodologique et a fait circuler une ébauche préliminaire du manuscrit aux membres du groupe de travail. Le Groupe d'étude s'est réuni en mai 1998. C'est à ce moment que les décisions finales quant aux recommandations ont été prises à l'unanimité par le groupe et l'auteur principal. Les commentaires de trois experts indépendants ont été intégrés à l'ébauche finale du manuscrit qui a été passé en revue par le directeur du Groupe d'étude avant d'être soumis pour publication.

## Qualité et classification des preuves

La recherche a permis de recenser 23 articles. L'examen des listes bibliographiques a fourni 45 autres articles, dont le rapport d'une étude randomisée contrôlée de publication récente et deux autres méta-analyses. En tout, sept études cliniques randomisées contrôlées et six méta-analyses ont été passées en revue. La méthodologie et la qualité de chaque étude sont résumées aux Tableaux 2 et 3. Les plus

**Tableau 2 : Risque relatif de mortalité des suites du cancer du sein signalé dans des études randomisées contrôlées sur la mammographie de dépistage chez des femmes âgées de 40 à 49 ans au moment de leur admission à l'étude**

| Étude*                        | Années des dépistages | Intervention (et intervalle en mois) | Durée du suivi, ans | Groupe; nbre de femmes |         | RR (et IC 95 %) | NNS  | Niveau de preuve† |
|-------------------------------|-----------------------|--------------------------------------|---------------------|------------------------|---------|-----------------|------|-------------------|
|                               |                       |                                      |                     | M                      | Témoins |                 |      |                   |
| HIP15–18‡                     | 1963–1970             | ES + M (12 m)                        | 18                  | 14 432                 | 14 701  | 0,8 (0,53–1,11) | s.o. | I                 |
| Malmo <sup>6,19,20</sup> §    | 1976–1990             | M (18–24 m)                          | 10–15,5             | 13 528                 | 12 242  | 0,6 (0,45–0,89) | 500  | I                 |
| Two County <sup>21–26</sup> ‡ | 1977–1985             | M (24 m)                             | 13                  | 19 844                 | 15 604  | 0,9 (0,54–1,41) | s.o. | I                 |
| Edinburgh <sup>27–30</sup> §  | 1979–1988             | ES + M (24 m)¶                       | 10–14               | 11 505                 | 10 269  | 0,8 (0,51–1,32) | s.o. | I                 |
| NBSS-1 <sup>2,3,31–39</sup> ‡ | 1980–1988             | ES + M (12 m)                        | 10,5                | 25 214                 | 25 216  | 1,1 (0,83–1,56) | s.o. | I                 |
| Stockholm <sup>40–42</sup> ‡  | 1981–1985             | M (28 m)                             | 11,4                | 14 842                 | 7 108   | 1,1 (0,54–2,17) | s.o. | I                 |
| Gothenburg <sup>5</sup>       | 1982–1992             | M (18 m)                             | 10                  | 11 724                 | 14 217  | 0,6 (0,31–0,96) | 782  | I                 |

ES = examen du sein; M = mammographie; RR = risque relatif; IC = intervalle de confiance; NNS = nombre qu'il faut dépister sur une période de dix ans pour prévenir un décès des suites du cancer du sein; s.o. = sans objet.

\*HIP = Health Insurance Plan Trial, Malmo = Malmo I et II Mammographic Screening Trials, Two County = Swedish Two-County Trial, Edinburgh = Edinburgh Randomized Trial, NBSS-1 = Canadian National Breast Screening Study 1, Stockholm = Stockholm Breast Cancer Screening Trial, Gothenburg = Gothenburg Breast Screening Trial.

†Analyse rétrospective des sous-groupes dans toutes les études sauf NBSS-1.

‡Étude non dotée d'une puissance suffisante pour exclure une réduction potentiellement significative de 20 % du risque relatif.

§N'incluait que les femmes de 45 à 49 ans.

¶L'examen du sein était annuel; la mammographie, bisannuelle.

**Tableau 3 : Méthodologie des études sur le dépistage du cancer du sein chez les femmes de 40 à 49 ans**

| Étude      | Échantillon                             | Méthode de randomisation                                     | Contamination, %† | Fidélité au premier examen, % | Clichés de mammographie                           | Dose de radiation par sein | Lecture à double insu                               |
|------------|-----------------------------------------|--------------------------------------------------------------|-------------------|-------------------------------|---------------------------------------------------|----------------------------|-----------------------------------------------------|
| HIP        | Participant HMO                         | Échantillon aléatoire assorti selon l'âge                    | Peu probable      | 57                            | 2 (CC + ML)                                       | 5 cGy                      | Tous les clichés                                    |
| Malmo      | Assignation de 50 % des résidentes      | selon année de naissance                                     | 35                | 75                            | 2 initialement (CC + MLO), puis 1–2               | 1 mGy                      | Aucune                                              |
| Two County | Toutes les résidentes                   | par région                                                   | N.S.              | 88–93‡                        | 1 (MLO)                                           | 1,1 mGy                    | Aucune                                              |
| Edinburgh  | Patientes d'omnipraticiens participants | par pratique                                                 | N.S.              | 63,8‡                         | 2 initialement (CC + MLO), puis 1–2               | 6 mGy                      | Échantillon aléatoire (5 %) + clichés anormaux      |
| NBSS-1     | Volontaires                             | Individuel                                                   | 26,4              | 99                            | 2 (CC + ML ou MLO)                                | 5 mGy                      | Échantillon aléatoire (10 % anormaux + 1 % normaux) |
| Stockholm  | Toutes les résidentes                   | Selon date de naissance                                      | 25–30             | 80                            | 1 (MLO)                                           | N.S.                       | Aucune                                              |
| Gothenburg | Toutes les résidentes                   | 18 % de l'échantillon par date de naissance; 82 % individuel | 51                | 75–86                         | 2 initialement (CC + MLO), puis 1–2; écran mobile | N.S.                       | Tous les clichés à partir du quatrième dépistage    |

HMO : participantes d'organisations américaines du maintien de la santé (health maintenance organization), ES = Établissements de santé, N.S. = non signalé; CC = crânio-caudal, ML = médiolaterale, MLO = médiolaterale oblique.

†% de sujets témoins qui ont subi une mammographie de dépistage.

‡Valeurs pour le sous-groupe âgé de < 50 ans.

récentes méta-analyses<sup>7,8</sup> ont été évaluées en fonction de critères décrits par l'Abbé et ses collaborateurs.<sup>43</sup>

### Études randomisées contrôlées

Les sept études randomisées contrôlées ont eu recours à des analyses d'intention de traiter et avaient pour principal paramètre le taux de mortalité par cancer du sein. Deux des études ont fait état d'un avantage chez les femmes de 40 à 49 ans. Les résultats de l'une (l'étude Göteborg<sup>5</sup>) n'ont été analysés qu'une fois et ceux de l'autre (l'étude Malmö<sup>6,19,20</sup>) ont été analysés deux fois par les auteurs de l'étude.

La plupart des études n'étaient pas dotées d'une puissance statistique permettant d'exclure une différence potentiellement significative sur le plan clinique, comme une réduction de 20 % du risque relatif, par exemple. Aucun calcul de la taille de l'échantillon n'a été publié dans le cas du Göteborg Breast Screening Trial,<sup>5</sup> des études mixtes Malmö I et II,<sup>6</sup> du Swedish Two-County Trial<sup>21</sup> ou du Stockholm Mammographic Screening Trial.<sup>40</sup> La taille de l'échantillon pour l'étude Malmö I a été choisie de façon à déceler une réduction de 25 % de la mortalité (chez les femmes de 45 à 69 ans) avec un  $\alpha$  de 0,05 et un  $\beta$  de 0,10. Dans bien des cas, la puissance calculée a été affaiblie par une piètre observance au suivi et par un certain degré de contamination (Tableau 3). L'étude Health Insurance Plan (HIP),<sup>15</sup> conçue pour être dotée d'une puissance statistique susceptible de déceler une réduction de 20 % de la mortalité, a fait état d'une réduction de 25 % du risque relatif, ce qui ne s'est pas révélé statistiquement significatif. L'équipe d'Édimbourg a calculé que l'échantillon devait comprendre 65 000 femmes pour avoir une puissance de 80 % à déceler une réduction de 35 % du risque relatif à sept ans, avec une valeur  $p$  unilatérale de 0,05.<sup>27</sup> Tous les études susmentionnés portaient sur des femmes de 40 à 49 ans en sous-groupes rétrospectifs. La NBSS-1 qui n'incluait que cette tranche d'âge avait estimé une taille d'échantillon pour doter l'étude d'une puissance de 80 % à déceler une réduction de 40 % de la mortalité à cinq ans avec une valeur  $p$  unilatérale de 0,05.<sup>3</sup> Par contre, le taux de mortalité dans le groupe témoin a été inférieur au taux prévu et la contamination ne fut pas considérée. Pour les 10,5 ans de suivi,<sup>38</sup> la puissance réelle a été estimée adéquate pour déceler une réduction de la mortalité de 30 % ou plus avec une valeur  $p$  bilatérale de 0,05.

La discussion suivante s'attarde aux récentes mises à jour des études individuels.

**Étude HIP (1963–1970) :** La plus récente mise à jour incluait un suivi de 18 ans et a tenu compte de tous les décès par suite de cancer du sein diagnostiqué au cours des cinq années suivant le premier dépistage.<sup>18</sup> Chez les femmes de 40 à 49 ans, le premier dépistage (14 432 conviées et 14 701 témoins), on a noté une réduction non significative de 25 % de la mortalité, 50 et 66 décès ayant été recensés respectivement dans les deux groupes. Les résultats des tests d'hétérogénéité selon l'âge se sont révélés négatifs. Vingt-cinq pour cent seulement des cas ont été décelés à la mammographie seulement.<sup>17</sup>

**Études Malmö I (1976–1988) et II (1978–1990) sur la mammographie de dépistage :** Dans l'étude Malmö I, les femmes nées entre 1908 et 1932 ont été assignées aléatoirement à des groupes d'étude en 1977 et 1978.<sup>19</sup> Dans l'étude Malmö II, les femmes nées entre 1933 et 1945 ont été assignées aléatoirement de 1978 à 1990.<sup>6</sup> Un sous-groupe de 7984 femmes de la cohorte de l'étude Malmö I avait entre 45 et 49 ans au début de l'étude. Dans l'étude Malmö II, 17 786 femmes avaient de 45 à 48 ans au moment de leur admission. Les femmes ont en moyenne subi cinq dépistages et le suivi a duré en moyenne dix ans.<sup>6</sup>

La première analyse combinée des données fournies par les études Malmö I et II s'est limitée aux femmes ayant commencé à participer aux études entre l'âge de 44 et de 49 ans. Dans le groupe ayant subi le dépistage (13 528 femmes, totalisant 165 596 années-femmes de suivi), on a recensé 57 décès et dans le groupe témoin (12 242 femmes, totalisant 144 036 années-femmes de suivi), on en a dénombré 78. L'estimation ponctuelle du risque relatif a été de 0,64 (intervalle de confiance [IC] de 95 %, 0,45–0,89,  $p = 0,0009$ ). À partir de ces résultats, une réduction du risque absolu de 0,02 % par année se traduit par un nombre de 5067,91 dépistages pendant un an pour prévenir un décès des suites du cancer du sein, ce qui correspond à l'estimation de 500 à laquelle sont arrivés les auteurs pour un examen de dépistage tous les 18 à 24 mois pendant 12,5 ans chez les femmes de 45 à 49 ans.

**Swedish Two-County Trial — Östergötland (1977–1984) et Kopparberg (1978–1985) :** La plus récente analyse de mortalité comprenait un suivi de 13 ans en moyenne.<sup>25</sup> Le sous-groupe des femmes âgées de 40 à 49 ans au moment de leur admission à l'étude (19 844 conviées et 15 604 sujets-témoins) présentaient un risque relatif non significatif de 0,87 (IC 95 %, 0,54–1,41). Seulement 39 et 45 décès sont survenus respectivement dans les deux groupes. L'hétérogénéité selon l'âge au moment de la randomisation n'a pas été décelée. Les estimés ponctuels du risque relatif ont différé dans les deux comtés, soit un risque relatif de 1,02 (IC 95 %, 0,52–1,99) dans le comté d'Östergötland et de 0,73 (IC 95 %, 0,37–1,41) dans celui de Kopparberg.

**Edinburgh Randomized Trial (1979–1988) :** Des femmes de 45 à 64 ans ont été inscrites à l'étude entre 1979 et 1981,<sup>27</sup> d'autres ayant été admises si elles atteignaient l'âge de 45 ans avant 1985.<sup>28</sup> Aucune différence statistiquement significative du taux de mortalité n'a été observée entre le groupe exposé et le groupe témoin. L'analyse du sous-groupe des femmes âgées de 45 à 49 ans au moment de leur admission (avec un suivi moyen de 14 ans dans le sous-groupe de 11 391 personnes tirées de la cohorte originale et de 10 à 12 ans de suivi dans le groupe de 10 383 personnes inscrites entre 1982 et 1985) a fait état d'un risque relatif de 0,82 (IC 95 %, 0,51–1,32). Aucune hétérogénéité n'a été observée par rapport à toutes les participantes de l'étude. En tout, on a dénombré 46 décès des suites du cancer du sein parmi les 11 505 femmes du groupe de l'étude et 52 parmi les 10 269 sujets-témoins.<sup>29</sup> Le statut socio-économique a

représenté un facteur de confusion dans l'étude. Les corrections apportées pour tenir compte de ce facteur<sup>29</sup> ont éliminé la différence de mortalité d'autres causes que le cancer du sein et ont révélé un risque relatif de 0,75 (IC 95 %, 0,48–1,18) dans le sous-groupe des sujets qui avaient de 40 à 49 ans au moment de leur inscription à l'étude.

**Canadian National Breast Screening Study 1 (1980–1988) :** La NBSS-1 est la seule étude qui se soit restreinte aux femmes de 40 à 49 ans. Les doutes soulevés quant à la randomisation<sup>32–34</sup> n'ont pas été confirmés par les analyses internes et externes,<sup>35</sup> ni par l'examen d'une autre source de données.<sup>36</sup> Les participantes appartenaient à une classe socio-économique supérieure, présentaient de plus nombreux facteurs de risque de cancer du sein et fumaient moins que la population canadienne.<sup>3</sup> Un déséquilibre quant au nombre de femmes ayant plus de trois ganglions lymphatiques atteints a été noté entre le groupe de l'étude et le groupe témoin : 17 contre 5 au moment de la randomisation ( $p = 0,017$ ) et 47 contre 23 à sept ans ( $p = 0,006$ ).<sup>34</sup> Le nombre moindre d'ablations des ganglions lymphatiques dans le groupe témoin et le nombre plus élevé de décès chez les femmes ne présentant pas d'atteinte ganglionnaire donnent à penser que la différence ait pu être attribuable à une chirurgie plus énergique chez les femmes soumises au dépistage.<sup>38</sup> Aucune différence quant au taux de mortalité n'a été observée entre les groupes d'étude et témoin. Les suivis échelonnés jusqu'à la fin de 1993 (de 8,75 à 13 ans) ont fait état de 82 décès par suite du cancer du sein chez les 25 214 femmes soumises au dépistage et de 72 décès chez les 25 216 sujets témoins. Le risque relatif a été évalué à 1,14 (IC 95 %, 0,83–1,56).<sup>38</sup>

**Stockholm Breast Cancer Screening Trial (1981–1985) :** Le sous-groupe de femmes qui avaient 40 à 49 ans au moment de leur admission comprenait 14 842 patientes invitées à subir un dépistage et 7108 sujets-témoins.<sup>41</sup> Parmi les 173 866 années-femmes de suivi effectuées auprès des femmes soumises au dépistage, 24 décès des suites du can-

cer du sein ont été recensés, contre 12 parmi les 87 826 années-femmes de suivi dans le cas des sujets-témoins. Avec un suivi moyen de 11,4 ans, le risque relatif a été de 1,08 (IC 95 %, 0,54–2,17). Aucune différence statistiquement significative n'a été observée sur le plan de la mortalité entre les deux groupes.

**Gothenburg Breast Screening Trial (1982–1992) :** Attendus impatientement, les résultats de cette étude ont été publiés en 1997.<sup>5</sup> Toutes les résidentes de Gothenburg, en Suède, nées entre 1923 et 1944 ont été assignées aléatoirement à une mammographie tous les 18 mois, jusqu'à concurrence de cinq, ou au statut de sujet-témoin avec une seule mammographie à la fin de l'étude.<sup>5</sup> Une randomisation en grappes a été utilisée pour la cohorte de 1923–1936 et une randomisation individuelle pour la cohorte 1936–1944. Les données ont été analysées pour un sous-groupe de 25 941 femmes âgées de 39 à 49 ans au moment de leur inscription à l'étude (82 % randomisées individuellement) avec un suivi d'au moins 10 ans.<sup>5</sup> Le ratio utilisé pour répartir les femmes a été de 1:1,2, soit 11 724 femmes dans le groupe soumis au dépistage et 14 217 femmes dans le groupe témoin.

Le groupe de dépistage a connu 18 décès sur 138 402 années-femmes de suivi et le groupe témoin, 40 sur 168 025 années-femmes de suivi. Le risque relatif était de 0,55 (IC 95 %, 0,31–0,96,  $p = 0,046$ ).<sup>5</sup> La réduction du risque absolu de 1,28 par 1000 (taux de mortalité de 2,8 par 1000 dans le groupe témoin contre 1,5 par 1000 dans le groupe de l'étude) s'est traduite par un nombre de 782 sujets nécessitant un dépistage pour les cinq examens à 18 mois d'intervalle.

### Méta-analyses

Le Tableau 4 résume les six méta-analyses examinées. La plus récente, regroupant toutes les études,<sup>7</sup> comportait un suivi moyen de 12,7 ans (minimum 10,5 ans), incluait 17 000 participantes supplémentaires de l'étude Malmö II et

**Tableau 4 : Risque relatif de mortalité des suites du cancer du sein signalé dans les méta-analyses de mammographies de dépistage chez les femmes de 40 à 49 ans au moment de leur admission à l'étude.**

| Méta-analyse                                  | Année | Durée<br>moyenne du<br>suivi, ans | RR (et IC 95 %)   | NNS+  | Méthode d'analyse                    |
|-----------------------------------------------|-------|-----------------------------------|-------------------|-------|--------------------------------------|
| Smart et coll. <sup>44</sup>                  | 1995  | 10,4                              | 0,84 (0,69–1,02)  | s.o.  | Effets fixes de Mantel–Haenszel      |
| Kerlikowske et coll. <sup>45</sup>            | 1995  | 7–9                               | 0,92 (0,75–1,13)  | s.o.  | Effets fixes de Greenland            |
| Glazziou et coll. <sup>46</sup>               | 1995  | 7–9                               | 0,95 (0,77–1,18)  | s.o.  | Effets aléatoires de Mantel–Haenszel |
| Tabar <sup>47</sup>                           | 1996  | n.s.                              | 0,85 (0,71–1,01)  | s.o.  | Effets fixes de Mantel–Haenszel      |
| Kerlikowske (mise à jour) <sup>48</sup>       | 1997  | > 10–12                           | 0,84 (0,71–0,99)  | s.o.  | Effets fixes de Greenland            |
| Glazziou et coll. (mise à jour) <sup>49</sup> | 1997  | > 10–12                           | 0,85 (0,71–1,01)  | s.o.  | Effets aléatoires de Mantel–Haenszel |
| Hendrick et coll. <sup>7</sup>                | 1997  | 12,7                              | 0,82 (0,71–0,95)  | 1540* | Effets aléatoires de Mantel–Haenszel |
| Gotzsche et coll. <sup>8</sup>                | 2000  | n.s.                              | 1,04 (0,84–1,27)† | s.o.  | Effets fixes                         |

s.o. = sans objet, n.s. = non signalé + NNS : Nombre qu'il faut dépister (number needed to screen) sur une période de 10 ans pour prévenir un décès des suites du cancer du sein.

\*Réduction du risque absolu = 0,00005166 pour 1 an; NNS = 19 356 par année ou 1 540 pour le suivi moyen de 12,7 ans.

†Les auteurs ont exclu de l'analyse cinq études sur les 7 terminées en raison de biais observé.

se basait sur les résultats mis à jour pour tous les études à l'exception de l'étude HIP. Elle démontrait aussi un avantage statistiquement significatif (risque relatif 0,82, IC 95 %, 0,71–0,95). Cette méta-analyse a été la première à inclure toutes les participantes âgées de 40 à 49 ans qui ont pris part à des études randomisées contrôlées visant à évaluer la mortalité associée au cancer du sein. Rien n'a été fait pour évaluer la qualité relative des études. Les tests d'homogénéité n'ont indiqué aucune hétérogénéité significative ( $p = 0,2$ ).

Une nouvelle méta-analyse controversée, du Nordie Centre de la Cochrane Collaboration,<sup>8</sup> n'incluait que les études NBSS et Malmo I. Les auteurs ont passé en revue les rapports publiés et ont conclu principalement sur la base de l'âge moyen des groupes soumis aux interventions et des groupes témoins que la randomisation dans les études HIP, Malmo II, Swedish Two-County, Edinburgh, Stockholm et Göteborg avait été inadéquate. On sera peu étonné que l'analyse ait été dominée par les résultats négatifs de l'étude NBSS et qu'elle n'ait fait état d'aucun avantage associé à la mammographie de dépistage (risque relatif : 1,04, IC 95 %, 0,84–1,27). Cette analyse a été critiquée<sup>50–57</sup> et elle continuera sans contredit de faire l'objet de débats. Il est difficile par contre de penser que la sélection de 1,5 études sur sept n'introduit aucun biais.

## Effets de la mammographie de dépistage

Les avantages de la mammographie de dépistage sur le plan de la réduction de la mortalité sont compensés, du moins en partie, par ses effets négatifs potentiels. Les effets favorables et défavorables du dépistage non liés à la mortalité sont présentés au Tableau 5. Les avantages additionnels pour les femmes soumises au dépistage entre 40 et 49 ans comprennent le diagnostic de tumeurs de plus petite taille à un stade plus précoce.<sup>26</sup> La taille et le stade plus avancé de la tumeur sont prédictifs de traitements plus toxiques et d'un impact négatif sur le plan esthétique.<sup>59,60</sup>

Le risque estimé de la mortalité par cancer radio-induit est de 8 par 100 000 femmes ayant subi un dépistage annuel pendant 10 ans dès l'âge de 40 ans.<sup>58</sup> Ce taux est beaucoup plus bas que les 65,<sup>7</sup> 128<sup>5</sup> ou 200<sup>6</sup> décès par 100 000 femmes

qui auraient pu être prévenus par le dépistage échelonné au cours des mêmes dix ans.

Depuis une décennie que s'effectue le dépistage, 12,6 % des femmes plus jeunes inscrites à l'étude Malmo ont eu besoin d'autres mammographies et 0,56 % ont subi des biopsies, révélant la présence de lésions bénignes.<sup>6</sup> Dans l'étude Gothenburg, 2,5 % des femmes ont été rappelées, 0,9 % ont subi des biopsies à l'aiguille fine et 0,1 % ont subi une chirurgie qui révélait la présence d'une maladie bénigne.<sup>5</sup> Environ deux ou trois opérations ont été effectuées pour chaque décès prévenu (nombre devant être traité = 3). Aux États-Unis, une étude rétrospective sur les évaluations du dépistage et du diagnostic du cancer du sein dans une cohorte de communauté a révélé un taux de biopsie de 5333 par 100 000 femmes ayant subi le dépistage quatre fois en moyenne au cours d'une période de dix ans.<sup>61</sup> Par extrapolation (ce qui surestime les taux de faux-positifs<sup>65</sup>) appliquée au dépistage annuel, les auteurs ont estimé le taux de biopsies fausses positives à 18,6 % (IC 95 %, 9,8 %–41,2 %) et le risque de devoir subir un examen supplémentaire, à 56 % (IC 95 %, 39 %–76 %). Une extrapolation similaire à partir de données provenant de la Colombie-Britannique a suggéré un risque cumulatif de l'ordre 38 % sur dix ans pour ce qui est des résultats faussement positifs.<sup>66</sup> Les centres de dépistage spécialisés, comme ceux qui ont servi lors des études suédoises, peuvent réduire l'impact des résultats de dépistage faussement positifs.

Les effets psychologiques du dépistage ont fait l'objet de recherches dans le cadre de 12 études, la plupart étant incluses dans une analyse récente.<sup>67</sup> Le jour du dépistage, les femmes ressentent moins d'anxiété et de dépression qu'au départ.<sup>64</sup> Les patientes plus jeunes ont semblé plus anxieuses.<sup>68</sup> Les dysfonctions émotionnelles et physiques plus nombreuses<sup>69</sup> n'ont été observées que chez les femmes rappelées pour un autre test<sup>70</sup> et sont rentrées dans l'ordre huit mois plus tard.<sup>71</sup> Avec le temps, la détresse psychologique s'est atténuée chez les femmes dont les mammographies étaient normales ou faussement positives ou encore qui avaient des résultats de biopsie négatifs,<sup>72</sup> mais elle a augmenté chez les sujets dont on a confirmé le cancer.<sup>73</sup> Dans une étude américaine,<sup>62,63</sup> 17 % des femmes ayant subi une mammographie laissant présager un cancer ont souffert d'anxiété, contre 3 % de celles dont les résultats de mammographie étaient normaux. Les taux d'anxiété n'ont pas permis de prédire le taux de fidélité aux examens ultérieurs. Dans une enquête rétrospective auprès des participantes à l'étude NBSS,<sup>39</sup> 72 % des femmes se sont senties « rassurées » par le test de dépistage. On dispose de moins de renseignements sur les effets d'un résultat faussement négatif. La fausse rassurance n'a cependant pas diminué la fidélité au test de dépistage selon une étude américaine.<sup>62,63,67</sup>

On n'a pas encore quantifié tous les effets du dépistage auprès des femmes canadiennes et certains peuvent varier d'une femme à l'autre. Il faut tenir compte des préférences de chaque femme quand vient le temps d'appliquer des lignes directrices à cet égard.

**Tableau 5 : Effets de la mammographie de dépistage non liés à la mortalité**

| Effets positifs                                                                                                    | Effets négatifs                                                                                                                                    |
|--------------------------------------------------------------------------------------------------------------------|----------------------------------------------------------------------------------------------------------------------------------------------------|
| Dépistage des tumeurs à un stade plus précoce <sup>26</sup> (possiblement prédictif d'un traitement moins toxique) | Cancer radio-induit <sup>58</sup><br>Biopsies superflues (0,6 %–0,9 % des cas en Suède <sup>5,6</sup> et 5 %–9 % des cas aux É.-U. <sup>61</sup> ) |
| Amélioration de l'aspect cosmétique <sup>59,60</sup>                                                               | Stress psychologique du rappel (40 % des cas) <sup>62,63</sup>                                                                                     |
| Rassurance (72 % des cas) <sup>39</sup>                                                                            | Radiographies additionnelles (3 %–13 % des cas en Suède <sup>5,6</sup> et 56 % des cas aux É.-U. <sup>61</sup> )                                   |
| Réduction de l'anxiété provoquée par le cancer au moment du dépistage <sup>64</sup>                                | Risque de fausse rassurance                                                                                                                        |

## Interprétation

La seule étude randomisée contrôlée conçue pour évaluer la mammographie de dépistage chez les femmes de 40 à 49 ans n'était pas d'une puissance statistique adéquate pour exclure un avantage cliniquement significatif. D'autres résultats d'études randomisées contrôlées provenaient d'analyses rétrospectives de sous-groupes de ces études. Bien que ces études constituent des preuves de niveau I, à l'heure actuelle, leurs résultats divergents, les différences méthodologiques et plus encore, le ratio risque:avantage imprécis de la mammographie de dépistage nous empêchent de leur attribuer les cotes «bonnes» ou «satisfaisantes» à titre de recommandations.

De récentes mises à jour des études font ressortir un avantage moindre quant à la mortalité pour les femmes âgées de 40 à 49 ans que pour les femmes plus âgées et donnent à penser qu'il ne faudrait pas laisser s'écouler un intervalle de plus de deux ans entre les mammographies. Une récente méta-analyse faisait état d'une réduction du risque relatif de 18 %, selon deux études suédoises, sur le plan de la mortalité. Les estimations du nombre de mammographies nécessaires vont de 500<sup>6</sup> à 1540<sup>7</sup> dans les études où l'on a noté un effet favorable, comparativement à 526 à l'âge de 50 ans et 169 à l'âge de 60 ans.<sup>74</sup> Par contre, les coûts économiques et personnels du dépistage au Canada doivent être mesurés, et les conséquences psychologiques défavorables du dépistage n'ont pas encore été convenablement évaluées.

Une partie de la réduction des taux de mortalité observée chez les femmes ayant subi un dépistage durant la quarantaine est sans contredit attribuable aux mammographies effectuées après l'âge de 50 ans. Les analyses fondées sur la date du diagnostic sont sujettes à un biais lié au délai d'intervention. Une étude britannique actuellement en cours<sup>75</sup> assigne de façon aléatoire 195 000 femmes de 40 ou 41 ans à une mammographie annuelle ou aux soins habituels. Le devis de l'étude a été dotée d'une puissance statistique de l'ordre de 80 % pour déceler une réduction de 20 % de la mortalité. Les résultats ne seront pas disponibles avant 2003. Cela devrait enfin trancher la question, puisque l'on aura ainsi accès à un suivi échelonné sur

dix ans avant que ces femmes n'atteignent la cinquantaine. L'International Union Against Cancer a manifesté son intérêt à utiliser un modèle similaire ailleurs en Europe.<sup>76</sup>

Si la réduction du risque relatif de l'ordre de 18 % (cliniquement significatif) avancée par la méta-analyse se confirmait, il faudrait en mesurer le coût au moyen d'une méthode d'analyse décisionnelle intégrant l'utilisation des ressources et des techniques de calcul du rapport coût-efficacité. Tout doit donc être tenté pour que l'on obtienne des données plus objectives sur les effets physiques et psychologiques de la mammographie de dépistage.

## Recommandations

Selon les preuves actuelles concernant l'efficacité de la mammographie de dépistage, on ne peut déduire qu'il faille inclure ou exclure cette intervention dans l'examen de santé périodique des femmes de 40 à 49 ans exposées à un risque moyen de cancer du sein (recommandation de catégorie C) (Tableau 6). Lorsqu'elles atteignent l'âge de 40 ans, les Canadiennes doivent être avisées des avantages et risques potentiels de la mammographie de dépistage et guidées dans leur décision quant à l'âge à partir duquel elles souhaitent débiter. Ces directives ne s'appliquent pas aux femmes exposées à un risque plus grand de cancer du sein, aux femmes symptomatiques qui subissent une mammographie diagnostique ni aux femmes qui ont des antécédents de cancer du sein et qui sont soumises à des mammographies de vérification.

## Priorités de recherche

Il faudrait effectuer une méta-analyse des données initiales concernant les femmes de 40 à 49 ans participant à des études actuellement en cours. La taille de l'échantillon dans le cas de l'étude randomisé contrôlé britannique<sup>75</sup> devrait être confirmée si l'on veut s'assurer que l'observance et la contamination n'affaiblissent pas la puissance statistique de l'étude. La qualité des mammographies doit être maintenue constante si l'on y ajoute des centres de l'International Union Against Cancer. Il faudra en outre mesurer de façon prospective les effets psychologiques du dépistage

**Tableau 6 : Sommaire des recommandations quant à la mammographie de dépistage chez les femmes de 40 à 49 ans**

| Intervention                        | Efficacité                                                                                                                                                                                           | Niveau de preuve*                                           | Recommandation*                                                                                                                                                                                                                            |
|-------------------------------------|------------------------------------------------------------------------------------------------------------------------------------------------------------------------------------------------------|-------------------------------------------------------------|--------------------------------------------------------------------------------------------------------------------------------------------------------------------------------------------------------------------------------------------|
| Mammographie tous les 12 à 18 mois† | Réduction du risque relatif de mortalité liée au cancer du sein à 10 ans de l'ordre de 18 à 45 % mentionnée dans deux études cliniques et une méta-analyse; aucune réduction dans six autres études‡ | Études randomisées contrôlées <sup>2,3,5,6,15-42</sup> (I)§ | Les preuves actuelles ne permettent pas de recommander l'inclusion ou l'exclusion de la mammographie de dépistage dans l'examen de santé périodique des femmes de 40 à 49 ans, exposées à un risque moyen de cancer du sein (catégorie C)¶ |

\*Voir Annexe 1 pour les définitions de niveaux de preuve et de catégories de recommandations.

†Une comparaison des résultats d'études randomisées contrôlées suggère que, le cas échéant, un dépistage fréquent puisse être nécessaire. L'utilité d'ajouter un examen du sein à la mammographie est mal élucidée.

‡La seule étude qui a inscrit des Canadiennes ne fait état d'aucun effet de la mammographie de dépistage probablement en raison d'une puissance statistique insuffisante.

§Six études cliniques randomisées contrôlées sur les sept ont étudié la mammographie pour ce groupe d'âge sous forme d'analyse de sous-groupe.

¶Cela représente un changement par rapport à la recommandation de catégorie D de 1994. Des preuves de niveau I sont disponibles, mais certains résultats sont conflictuels et les questions pertinentes ne sont pas toutes résolues. Lorsqu'elles atteignent l'âge de 40 ans, les Canadiennes devraient être informées des bienfaits et risques potentiels de la mammographie de dépistage et guidées dans leur décision quant à l'âge à partir duquel elles souhaitent débiter leurs mammographies de dépistage.

du cancer du sein auprès d'un échantillon randomisé de participantes à l'étude britannique en cours à l'aide d'échelles validées et d'utilitaires conçus pour le domaine de la santé. La recherche doit se poursuivre pour étudier de nouvelles stratégies potentielles de prévention du cancer du sein, y compris le recours à des marqueurs génétiques, à l'imagerie nucléaire, à l'IRM et à la chimioprophylaxie.

*Intérêts concurrents* : Aucun déclaré.

*Remerciements* : Le Groupe d'étude canadien sur les soins de santé préventifs tient à remercier le Dr Suzanne W. Fletcher, de la Faculté de médecine de l'Université Harvard de Boston, le Dr Vivek Goel, du Département d'administration de la santé de l'Université de Toronto et le Dr Brenda J. Morrison, de l'Université de la Colombie-Britannique à Vancouver, qui ont passé en revue indépendamment l'ébauche précédente de cet article. Les vues exprimées dans ce rapport sont celles de l'auteur et du Groupe d'étude et ne reflètent pas nécessairement la position des examinateurs.

## Références

1. Institut national du cancer du Canada. *Statistiques canadiennes sur le cancer*. Toronto : L'Institut; 1999.
2. Miller AB, Howe GR, Wall C. The National Study of Breast Cancer Screening Protocol for a Canadian randomized controlled trial of screening for breast cancer in women. I 1981;4(3-4):227-58.
3. Miller AB, Baines CJ, To T, Wall C. Canadian National Breast Screening Study: 1. Breast cancer detection and death rates among women aged 40 to 49 years. I 1992;147(10):1459-76.
4. Morrison BJ. Dépistage du cancer du sein. Dans : Groupe d'étude canadien sur l'examen médical périodique. *Guide canadien de médecin clinique préventive*. Ottawa : Groupe Communication Canada; 1994. p. 891-900.
5. Bjurstam N, Bjorneld L, Duffy SW, Smith TC, Cahlin E, Eriksson O, et al. The Gothenburg Breast Screening Trial: first results on mortality, incidence, and mode of detection for women ages 39-49 years at randomization. *Cancer* 1997;80(11):2091-9.
6. Andersson I, Janzon L. Reduced breast cancer mortality in women under age 50: updated results from the Malmö Mammographic Screening Program. *J Natl Cancer Inst Monogr* 1997;(22):63-7.
7. Hendrick RE, Smith RA, Rutledge JH III, Smart CR. Benefit of screening mammography in women aged 40-49: a new meta-analysis of randomized controlled trials. *J Natl Cancer Inst Monogr* 1997;(22):87-92.
8. Gotzsche PC, Olsen O. Is screening for breast cancer with mammography justifiable? *Lancet* 2000;355:129-34.
9. AACR comments on mammography screening for women age 40 to 49. *Oncology (Huntingt)* 1997;11(3):368.
10. National Institutes of Health Consensus Development Panel. National Institutes of Health Consensus Development Conference statement: breast cancer screening for women ages 40-49, January 21-23, 1997. *J Natl Cancer Inst* 1997;89(14):1015-26.
11. Leitch AM, Dodd GD, Costanza M, Linver M, Pressman P, McGinnis L, et al. American Cancer Society guidelines for the early detection of breast cancer: update 1997. *CA Cancer J Clin* 1997;47(3):150-3.
12. National Cancer Advisory Board issues mammography screening recommendations. 1997. Bethesda : National Cancer Advisory Board; 1997. Disponible : [http://rex.nci.nih.gov/massmedia/pressreleases/ncabrecommend\\_part1.html](http://rex.nci.nih.gov/massmedia/pressreleases/ncabrecommend_part1.html) (accessed 2000 Dec 21).
13. Laupacis A, Sackett DL, Roberts RS. An assessment of clinically useful measures of the consequences of treatment. *N Engl J Med* 1988;318(26):1728-33.
14. Woolf SH, Battista RN, Anderson GM, Logan AG, Wang E. Assessing the clinical effectiveness of preventive maneuvers: analytic principles and systematic methods in reviewing evidence and developing clinical practice recommendations. A report by the Canadian Task Force on the Periodic Health Examination. *J Clin Epidemiol* 1990;43(9):891-905.
15. Shapiro S, Strax P, Venet L. Evaluation of periodic breast cancer screening with mammography. Methodology and early observations. *JAMA* 1966;195(9):731-8.
16. Shapiro S, Venet W, Strax P, Venet L, Roeser R. Ten- to fourteen-year effect of screening on breast cancer mortality. *J Natl Cancer Inst* 1982;69(2):349-55.
17. Shapiro S. Evidence on screening for breast cancer from a randomized trial. *Cancer* 1977;39(Suppl 6):2772-82.
18. Shapiro S. Periodic screening for breast cancer: the HIP Randomized Controlled Trial. Health Insurance Plan. *J Natl Cancer Inst Monogr* 1997;(22):27-30.
19. Andersson I, Andren L, Hildell J, Linell F, Ljungqvist U, Pettersson H. Breast cancer screening with mammography: a population-based, randomized trial with mammography as the only screening mode. *Radiology* 1979;132(2):273-6.
20. Andersson I, Aspegren K, Janzon L, Landberg T, Lindholm K, Linell F, et al. Mammographic screening and mortality from breast cancer: the Malmö Mammographic Screening Trial. *BMJ* 1988;297:943-8.
21. Tabar L, Gad A. Screening for breast cancer: the Swedish trial. *Radiology* 1981;138(1):219-22.
22. Fagerberg G, Baldetorp L, Grontoft O, Lundstrom B, Manson JC, Norden-skjold B. Effects of repeated mammographic screening on breast cancer stage distribution. Results from a randomised study of 92 934 women in a Swedish county. *Acta Radiol Oncol* 1985;24(6):465-73.
23. Tabar L, Fagerberg G, Duffy SW, Day NE. The Swedish two county trial of mammographic screening for breast cancer: recent results and calculation of benefit. *J Epidemiol Community Health* 1989;43(2):107-14.
24. Tabar L, Fagerberg G, Duffy SW, Day NE, Gad A, Grontoft O. Update of the Swedish two-county program of mammographic screening for breast cancer. *Radiol Clin North Am* 1992;30(1):187-210.
25. Tabar L, Chen HH, Fagerberg G, Duffy SW, Smith TC. Recent results from the Swedish two-county trial: the effects of age, histologic type, and mode of detection on the efficacy of breast cancer screening. *J Natl Cancer Inst Monogr* 1997;(22):43-7.
26. Duffy SW, Tabar L, Fagerberg G, Gad A, Grontoft O, South MC, et al. Breast screening, prognostic factors and survival: results from the Swedish two county study. *Br J Cancer* 1991;64(6):1133-8.
27. Roberts MM, Alexander FE, Anderson TJ, Forrest AP, Hepburn W, Huggins A, et al. The Edinburgh randomised trial of screening for breast cancer: description of method. *Br J Cancer* 1984;50(1):1-6.
28. Alexander FE, Anderson TJ, Brown HK, Forrest AP, Hepburn W, Kirkpatrick AE, et al. The Edinburgh randomised trial of breast cancer screening: results after 10 years of follow-up. *Br J Cancer* 1994;70(3):542-8.
29. Alexander FE, Anderson TJ, Brown HK, Forrest AP, Hepburn W, Kirkpatrick AE, et al. 14 years of follow-up from the Edinburgh randomised trial of breast-cancer screening. *Lancet* 1999;353(9168):1903-8.
30. Alexander F, Roberts MM, Lutz W, Hepburn W. Randomisation by cluster and the problem of social class bias. *J Epidemiol Community Health* 1989;43(1):29-36.
31. Baines CJ. Impediments to recruitment in the Canadian National Breast Screening Study: response and resolution. *Control Clin Trials* 1984;5(2):129-40.
32. Mettlin CJ, Smart CR. The Canadian National Breast Screening Study. An appraisal and implications for early detection policy. *Cancer* 1993;72(4 Suppl):1461-5.
33. Kopans DB, Halpern E, Hulka CA. Statistical power in breast cancer screening trials and mortality reduction among women 40-49 years of age with particular emphasis on the National Breast Screening Study of Canada. *Cancer* 1994;74(4):1196-203.
34. Tarone RE. The excess of patients with advanced breast cancer in young women screened with mammography in the Canadian National Breast Screening Study. *Cancer* 1995;75(4):997-1003.
35. Bailar JC III, MacMahon B. Randomization in the Canadian National Breast Screening Study: a review for evidence of subversion. *CMAJ* 1997;156(2):193-9. Disponible : [www.cma.ca/cmaj/vol-156/issue-2/0193.htm](http://www.cma.ca/cmaj/vol-156/issue-2/0193.htm)
36. Cohen MM, Kaufert PA, MacWilliam L, Tate RB. Using an alternative data source to examine randomization in the Canadian National Breast Screening Study. *J Clin Epidemiol* 1996;49(9):1039-44.
37. Baines CJ. A different view on what is known about breast screening and the Canadian National Breast Screening Study. *Cancer* 1994;74(4):1207-11.
38. Miller AB, To T, Baines CJ, Wall C. The Canadian National Breast Screening Study: update on breast cancer mortality. *J Natl Cancer Inst Monogr* 1997;(22):37-41.
39. Baines CJ, To T, Wall C. Women's attitudes to screening after participation in the National Breast Screening Study. A questionnaire survey. *Cancer* 1990;65(7):1663-9.
40. Frisell J, Glas U, Hellstrom L, Somell A. Randomized mammographic screening for breast cancer in Stockholm. Design, first round results and comparisons. *Breast Cancer Res Treat* 1986;8(1):45-54.
41. Frisell J, Eklund G, Hellstrom L, Glas U, Somell A. The Stockholm Breast Cancer Screening Trial: 5-year results and stage at discovery. *Breast Cancer Res Treat* 1989;13(1):79-87.
42. Frisell J, Lidbrink E. The Stockholm Mammographic Screening Trial: risks and benefits in age group 40-49 years. *J Natl Cancer Inst Monogr* 1997;(22):49-51.
43. L'Abbe KA, Detsky AS, O'Rourke K. Meta-analysis in clinical research. *Ann Intern Med* 1987;107(2):224-33.
44. Smart CR, Hendrick RE, Rutledge JH, Smith RA. Benefit of mammography screening in women ages 40 to 49 years. Current evidence from randomized controlled trials. *Cancer* 1995;75(7):1619-26.
45. Kerlikowske K, Grady D, Rubin SM, Sandrock C, Ernster VL. Efficacy of screening mammography. A meta-analysis. *JAMA* 1995;273(2):149-54.
46. Glasziou PP, Woodward AJ, Mahon CM. Mammographic screening trials for women aged under 50. A quality assessment and meta-analysis. *Med J Aust* 1995;162(12):625-9.
47. Report of the Organising Committee and Collaborators Falun Meeting. Breast-cancer screening with mammography in women aged 40-49 years.

- Swedish Cancer Society and the Swedish National Board of Health and Welfare. *Int J Cancer* 1996;68(6):693-9.
48. Kerlikowske K. Efficacy of screening mammography among women aged 40 to 49 years and 50 to 69 years: comparison of relative and absolute benefit. *J Natl Cancer Inst Monogr* 1997;(22):79-86.
  49. Glasziou P, Irwig L. The quality and interpretation of mammographic screening trials for women ages 40-49. *J Natl Cancer Inst Monogr* 1997;(22):73-7.
  50. De Koning HJ. Assessment of nationwide cancer-screening programmes. *Lancet* 2000;355:80-1.
  51. Miller AB, Baines CJ, To T, Wall C. Screening mammography re-evaluated. *Lancet* 2000;355:747.
  52. Duffy SW, Tabar L. Screening mammography re-evaluated. *Lancet* 2000;355:747-8.
  53. Moss S, Blanks R, Quinn MJ. Screening mammography re-evaluated. *Lancet* 2000;355(9205):748.
  54. Nystrom L. Screening mammography re-evaluated. *Lancet* 2000;355:748-9.
  55. Hayes C, Fitzpatrick P, Daly L, Buttner J. Screening mammography re-evaluated. *Lancet* 2000;355:749.
  56. Law M, Hackshaw A, Wald N. Screening mammography re-evaluated. *Lancet* 2000;355:749-50.
  57. Cates C, Senn S. Screening mammography re-evaluated. *Lancet* 2000;355:750.
  58. Feig SA, Hendrick RE. Radiation risk from screening mammography of women aged 40-49 years. *J Natl Cancer Inst Monogr* 1997;(22):119-24.
  59. Dewar JA, Benhamou S, Benhamou E, Arriagada R, Petit JY, Fontaine F, et al. Cosmetic results following lumpectomy, axillary dissection and radiotherapy for small breast cancers. *Radiother Oncol* 1988;12(4):273-80.
  60. Taylor ME, Perez CA, Halverson KJ, Kuske RR, Philpott GW, Garcia DM, et al. Factors influencing cosmetic results after conservation therapy for breast cancer. *Int J Radiat Oncol Biol Phys* 1995;31(4):753-64.
  61. Elmore JG, Barton MB, Mocerri VM, Polk S, Arena PJ, Fletcher SW. Ten-year risk of false positive screening mammograms and clinical breast examinations. *N Engl J Med* 1998;338(16):1089-96.
  62. Lerman C, Trock B, Rimer BK, Boyce A, Jepson C, Engstrom PF. Psychological and behavioral implications of abnormal mammograms. *Ann Intern Med* 1991;114(8):657-61.
  63. Lerman C, Trock B, Rimer BK, Jepson C, Brody D, Boyce A. Psychological side effects of breast cancer screening. *Health Psychol* 1991;10(4):259-67.
  64. Walker LG, Cordiner CM, Gilbert FJ, Needham G, Deans HE, Affleck IR, et al. How distressing is attendance for routine breast screening? *Psychooncology* 1994;3(4):299-304.
  65. Fletcher SW. Breast cancer screening among women in their forties: an overview of the issues. *J Natl Cancer Inst Monogr* 1997;(22):5-9.
  66. Olivetto IA, Kan L, Coldman AJ. False positive rate of screening mammography. *N Engl J Med* 1998;339(8):560.
  67. Steggle S, Lightfoot N, Sellick SM. Psychological distress associated with organized breast cancer screening. *Cancer Prev Control* 1998;2(5):213-20.
  68. Sutton S, Saidi G, Bickler G, Hunter J. Does routine screening for breast cancer raise anxiety? Results from a three wave prospective study in England. *J Epidemiol Community Health* 1995;49(4):413-8.
  69. Swanson V, McIntosh IB, Power KG, Dobson H. The psychological effects of breast screening in terms of patients' perceived health anxieties. *Br J Clin Pract* 1996;50(3):129-35.
  70. Lightfoot N, Steggle S, Wilkinson D, Bissett R, Bakker D, Thoms J, et al. The short-term psychological impact of organized breast screening. *Current Oncol* 1994;1:206-11.
  71. Cockburn J, Staples M, Hurley SF, De Luise T. Psychological consequences of screening mammography. *J Med Screen* 1994;1(1):7-12.
  72. Bull AR, Campbell MJ. Assessment of the psychological impact of a breast screening programme. *Br J Radiol* 1991;64(762):510-5.
  73. Ellman R, Angeli N, Christians A, Moss S, Chamberlain J, Maguire P. Psychiatric morbidity associated with screening for breast cancer. *Br J Cancer* 1989;60(5):781-4.
  74. Harris R. Variation of benefits and harms of breast cancer screening with age. *J Natl Cancer Inst Monogr* 1997;(22):139-43.
  75. Reynolds T. British trial aims to settle mammography questions. *J Natl Cancer Inst* 1995;87(5):338-41.
  76. Eckhardt S, Badellino F, Murphy GP. UICC meeting on breast-cancer screening in pre-menopausal women in developed countries. *Cancer* 1994;73(3):745-9.

**Demandes de tirés à part :** Groupe d'étude canadien sur les soins de santé préventifs, Parkwood Hospital, 801 Commissioners Rd. E, London ON N6C 5J1; ctf@ctfphc.org

## Membres du Groupe d'étude canadien sur les soins de santé préventifs

**Président**  
 Dr John W. Feightner, professeur, Département de médecine familiale, Université Western Ontario, London (Ont.).  
**Président sortant :** Dr Richard Goldbloom, professeur, Département de pédiatrie, Université Dalhousie, Halifax (N.-É.).  
**Membres :** les Drs R. Wayne Elford, professeur et directeur de la recherche, Département de médecine familiale, Université de Calgary, Calgary (Alta.); Michel Labrecque, professeur agrégé et directeur de la recherche, Département de médecine familiale et Centre hospitalier universitaire de Québec, Université Laval, Québec (Qué.); Robin McLeod, professeur, Département de chirurgie, Mount Sinai Hospital et Université de Toronto, Toronto (Ont.); Harriet MacMillan, professeure agrégée, Départements de psychiatrie et de pédiatrie et Centre for Studies of Children at Risk, Université McMaster, Hamilton (Ont.); Jean-Marie Moutquin, professeur, Département d'obstétrique-gynécologie et Centre de recherches Saint-François-d'Assise, Université Laval, Québec (Qué.); Christopher Patterson, professeur et directeur, Division de gériatrie, Département de médecine, Université McMaster, Hamilton (Ont.); Elaine E.L. Wang, professeure agrégée, Département de pédiatrie et de santé publique, Faculté de médecine, Université de Toronto, Toronto (Ont.).  
**Personnes ressources :** Nadine Wathen, coordonnatrice, Ruth Walton et Tim Pauley, assistants de recherche, Groupe d'étude canadien sur les soins de santé préventifs, Département de médecine familiale, Université Western Ontario, London (Ont.).

## Annexe 1 : Groupe d'étude canadien sur les soins de santé préventifs : qualité des preuves et classification des recommandations

### Qualité des preuves

Résultats obtenus dans le cadre d'au moins une étude comparative convenablement randomisée.

Résultats obtenus dans le cadre d'études comparatives non randomisées bien conçues.

Résultats obtenus dans le cadre d'études de cohortes ou d'études analytiques cas-témoins bien conçues, réalisées de préférence dans plus d'un centre ou par plus d'un groupe de recherche.

Résultats découlant de comparaisons entre différents lieux ou selon qu'on a ou non recours à une intervention. Des résultats de première importance obtenus dans le cadre d'études non comparatives (par exemple, les résultats du traitement à la pénicilline dans les années 1940) pourraient en outre figurer dans cette catégorie.

Opinions exprimées par des sommités dans le domaine, fondées sur l'expérience clinique, études descriptives ou rapports de comités d'experts.

### Classification des recommandations

On dispose de données suffisantes pour appuyer la recommandation selon laquelle il faudrait s'intéresser expressément à cette affection ou à cette intervention dans le cadre d'un examen périodique de santé.

On dispose de données acceptables pour appuyer la recommandation selon laquelle il faudrait s'intéresser expressément à cette affection ou à cette intervention dans le cadre d'un examen périodique de santé.

On dispose de données insuffisantes pour appuyer l'inclusion ou l'exclusion de cette affection ou à cette intervention dans le cadre d'un examen périodique de santé, mais les recommandations peuvent reposer sur d'autres bases.

On dispose de données acceptables pour appuyer la recommandation de ne pas s'intéresser à cette affection ou à cette intervention dans le cadre d'un examen périodique de santé.

On dispose de données suffisantes pour appuyer la recommandation de ne pas s'intéresser à cette affection ou à cette intervention dans le cadre d'un examen périodique de santé.
